# Supplementary material for: Ionic resorcinarenes as drug solubilization agents in water
Source: Royal Society of Chemistry journal article supplement (doi:10.1039/d4ra06682k), 2024-01-01
Supplement: d4ra06682k1.pdf [file d4ra06682k1.pdf]

## Ionic Resorcinarenes as Drug Solubilization Agents in Water

Frank Boateng Osei,<sup>a</sup> Kwaku Twum,<sup>a</sup> Barbara Manfredi,<sup>b</sup> Mariana Fatohi,<sup>a</sup> Yvonne Bessem Ojong,<sup>a</sup> Valance Washington,<sup>b</sup> Ngong Kodiah Beyeh\*<sup>a</sup>

<sup>a</sup>Oakland University, Department of Chemistry, 146 Library Drive, Rochester, MI 48309-4479, USA

<sup>b</sup>Oakland University, Department of Biological Sciences, 118 Library Drive, Rochester, MI 48309-4452, USA

### SUPPORTING INFORMATION

#### Table of Contents

|                                          |    |
|------------------------------------------|----|
| GENERAL .....                            | 2  |
| SYNTHESIS .....                          | 2  |
| NMR SPECTROSCOPY .....                   | 5  |
| ISOTHERMAL CALORIMETRIC TITRATIONS ..... | 7  |
| DYNAMIC LIGHT SCATTERING .....           | 9  |
| CYTOTOXICITY ASSESSMENTS .....           | 10 |
| REFERENCES .....                         | 10 |

## GENERAL

We report the synthesis of novel macrocyclic receptor **R1** and that of **R2** which was synthesized according to reported procedures<sup>1-3</sup>. Drug compounds were purchased from Sigma Aldrich. The <sup>1</sup>H and <sup>13</sup>C NMR experiments were carried out in D<sub>2</sub>O at 298 K on Bruker Avance 400 MHz spectrometers. HRMS was done using ESI in negative mode. ITC measurements were performed using the VP-ITC instrument made by Malvern Panalytical. DLS experiments were carried out in deionized water using a zetasizer nano from Malvern Panalytical. Cytotoxicity experiments were carried out on HEK-293 cells

## SYNTHESIS

### Synthesis of R1

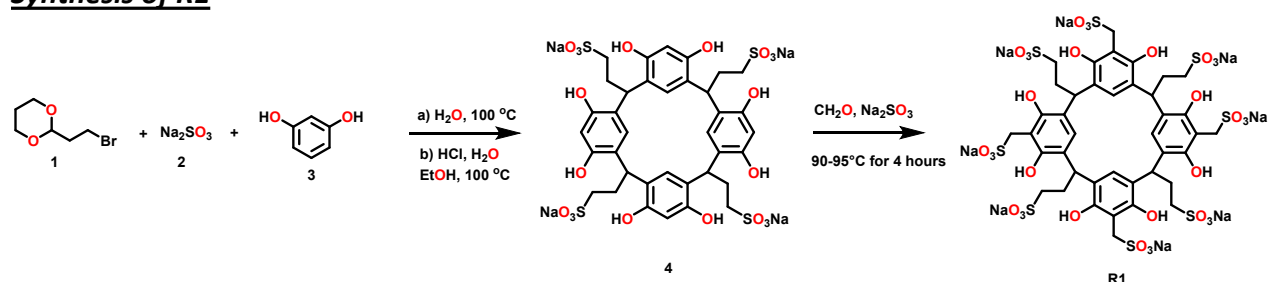

Figure S1: Synthesis of octa-sulfonated resorcinarenes **R1**.

A two-phase mixture of 2-(2-bromoethyl)-1,3-dioxane, **1** (4.0 g, 20 mmol) and an aqueous solution (20 mL) of  $\text{Na}_2\text{SO}_3$ , **2** (5.0 g, 40 mmol) was stirred at 100 °C for 24 hours. To the resulting homogeneous solution was added water (20 mL), and the mixture was washed with ether (40 mL x2) to get rid of unreacted **1**. To this were successively added ethanol (40 mL), resorcinol, **3** (4.0 g, 36 mmol), and concentrated HCl (6 mL). The mixture was stirred under nitrogen at 100 °C for 24 h. The solvent was evaporated, and the residue was taken in water (60 mL) and dialyzed three times against water (2 L) using a dialysis membrane having a transport critical molecular weight of 1000 (Spectra/Por membrane MWCO 1000) to remove inorganic salts. Most of the water was removed in vacuo, and the residue was triturated from methanol to give compound **4**. Compound **4** (0.01 mol), a solution of 37% formaldehyde (0.01mol) and sodium sulfite (0.01M) in  $\text{H}_2\text{O}$  (30 ml) was stirred and heated at 90–95 °C for 4 h. Dilute hydrochloric acid was added after cooling until pH 7, then methanol (50 ml or more) was added to precipitate the product **R1**. The solid was filtered and dried. ESI-MS:  $(\text{C}_{40}\text{H}_{45}\text{O}_{32}\text{S}_8)^{-3}$  calc. = 430.9899 found = 430.9892 (1.7238 ppm);  $(\text{C}_{40}\text{H}_{44}\text{O}_{32}\text{NaS}_8)^{-3}$  calc. = 438.3172 found = 438.3165 (1.5637 ppm).

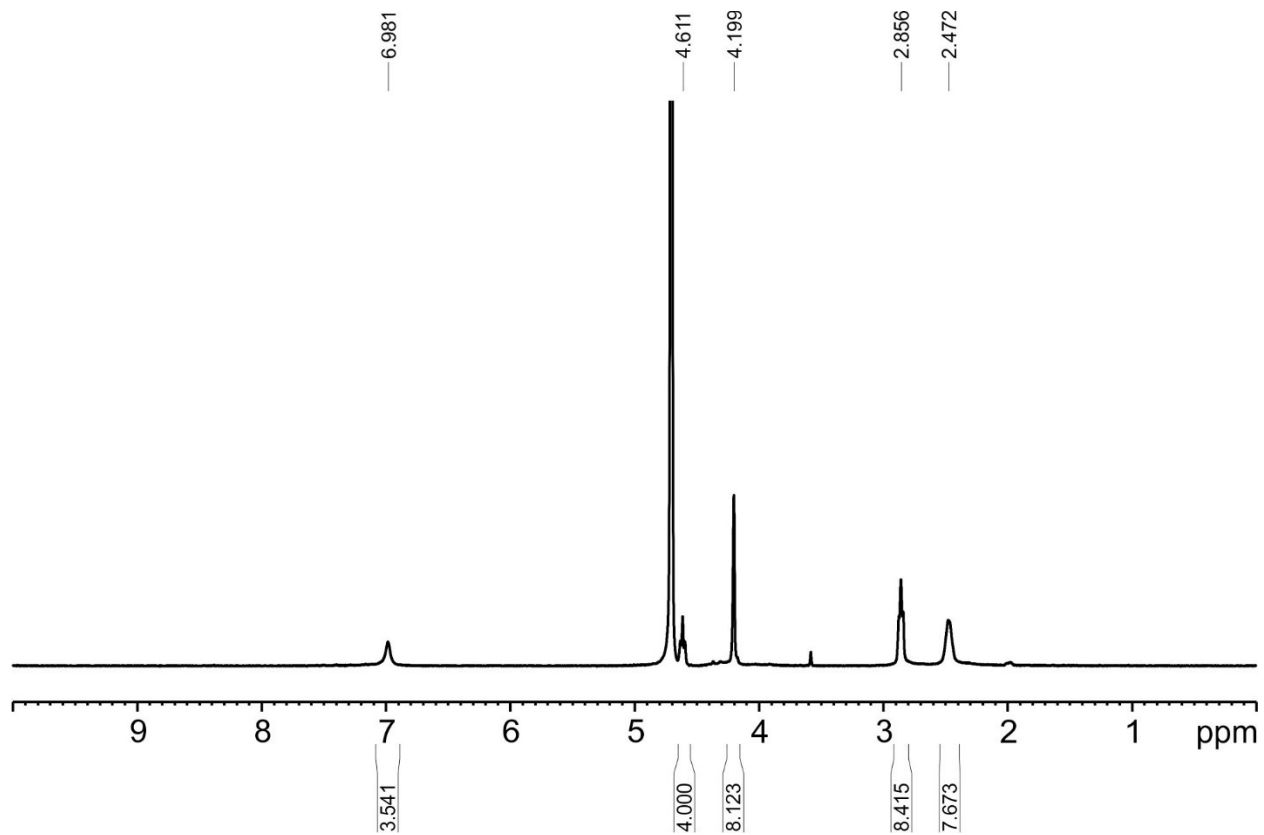

Figure S2:  $^1\text{H}$  NMR spectra of octa sulfonated resorcinarene **R1** at 400 MHz in  $\text{D}_2\text{O}$  at 298 K.

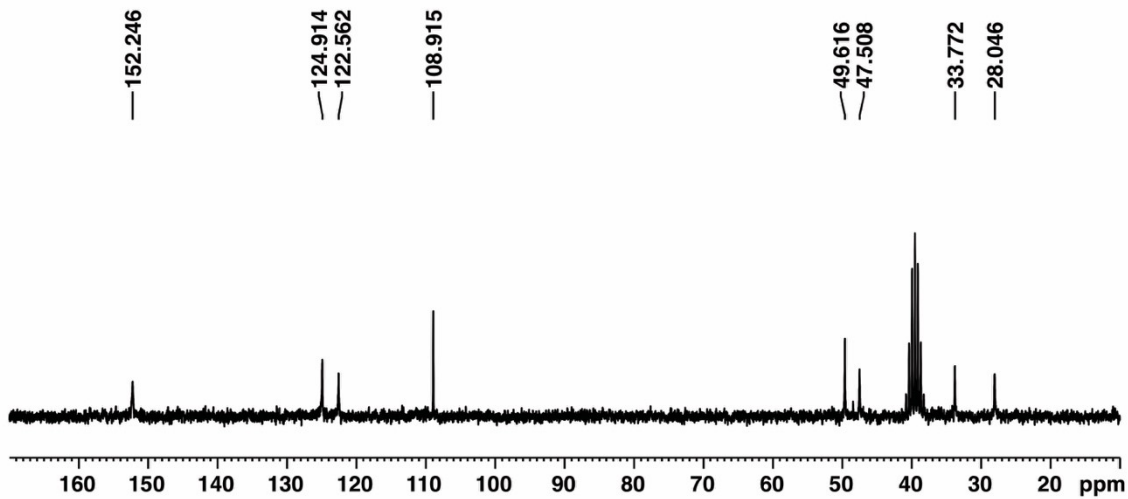

Figure S3:  $^{13}\text{C}$  NMR spectra of octa sulfonated resorcinarene **R1** at 400 MHz in  $\text{D}_2\text{O}$  at 298 K.

## Thermo LTQ-Orbitrap XL ESI Negative Mode

1 #38-48 RT: 1.22-1.50 AV: 11 NL: 4.43E6  
F: FTMS - c ESI Full ms [150.00-2000.00]

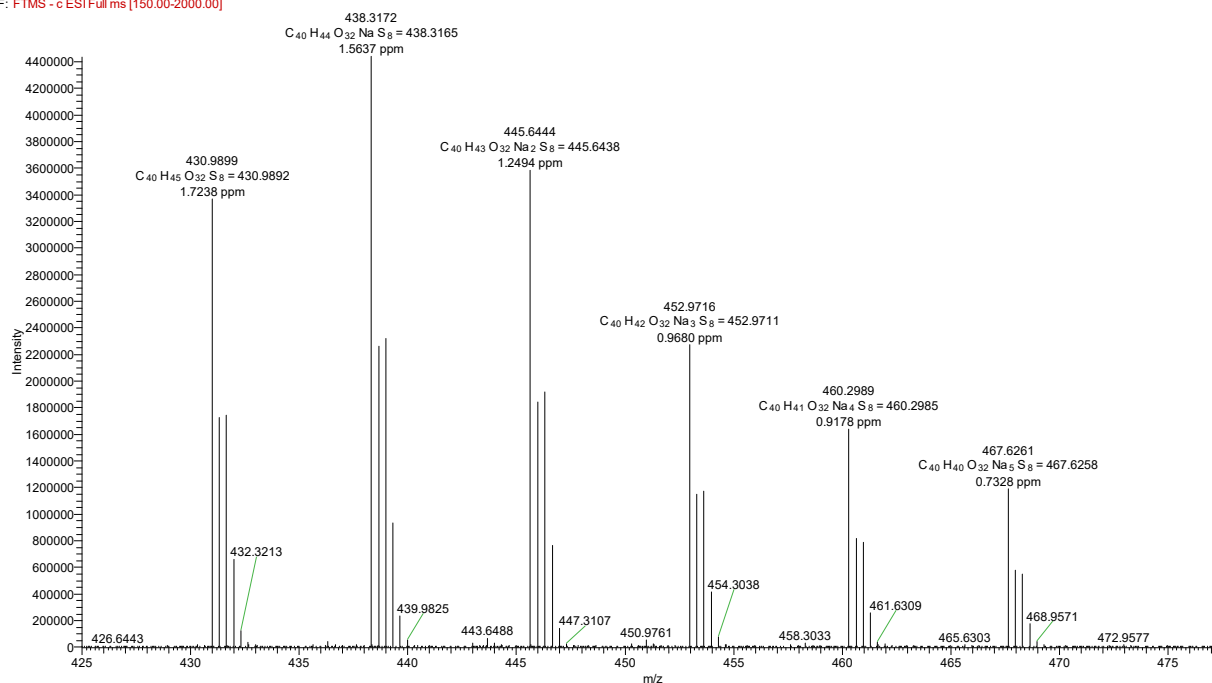

Figure S4. HRMS of octa sulfonated resorcinarene **R1**.

## Synthesis of **R2**

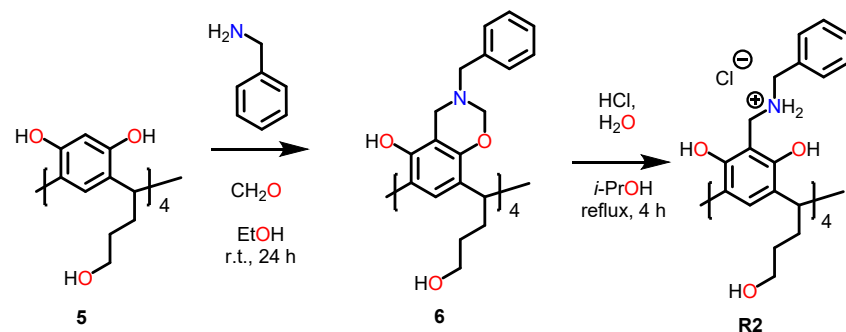

Figure S5: Synthetic scheme for N-benzyl-C-3 propanol resorcinarene **R2**.

Synthesis of this compound has been previously reported<sup>4</sup>. Briefly, resorcinarene, **5** (5.0 g, 6.9 mmol) and excess formaldehyde solution 36 % (28 mL), ethanol (60 mL), benzylamine (3.18 mL, 29.11 mmol) in ethanol (15 mL) were stirred together for 24 hours. The N-benzyl tetrahydrobenzoxazine (**6**) precipitate was filtered and dried and used in the next step without further purification. **6** (1.0 g, 0.92 mmol), isopropanol (40 mL), concentrated hydrochloric acid (3 mL), and H<sub>2</sub>O (4 mL) were refluxed together for 4 hours. The precipitate was washed with ethyl acetate and then with diethyl ether to give the product **R2** (371.8 mg, 23.8 %).

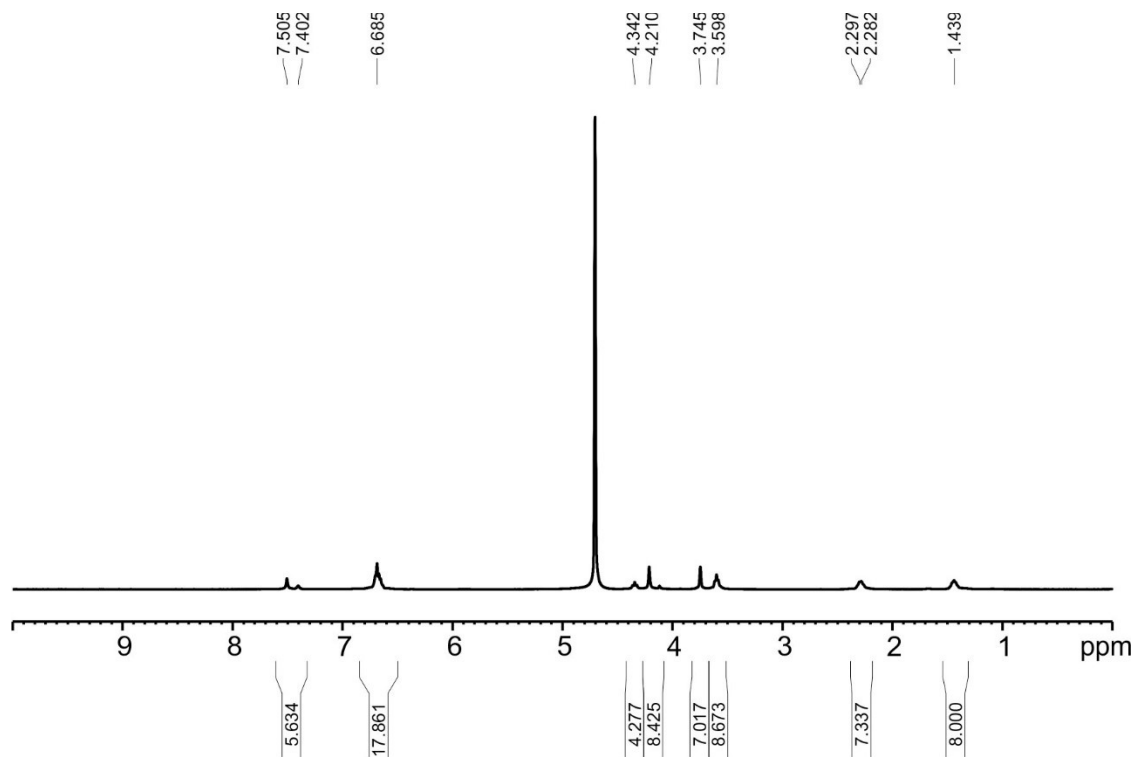

Figure S6:  $^1\text{H}$  NMR spectra of N-benzyl-C-3 propanol resorcinarene **R2** at 400 MHz in  $\text{D}_2\text{O}$  at 298 K.

## NMR SPECTROSCOPY

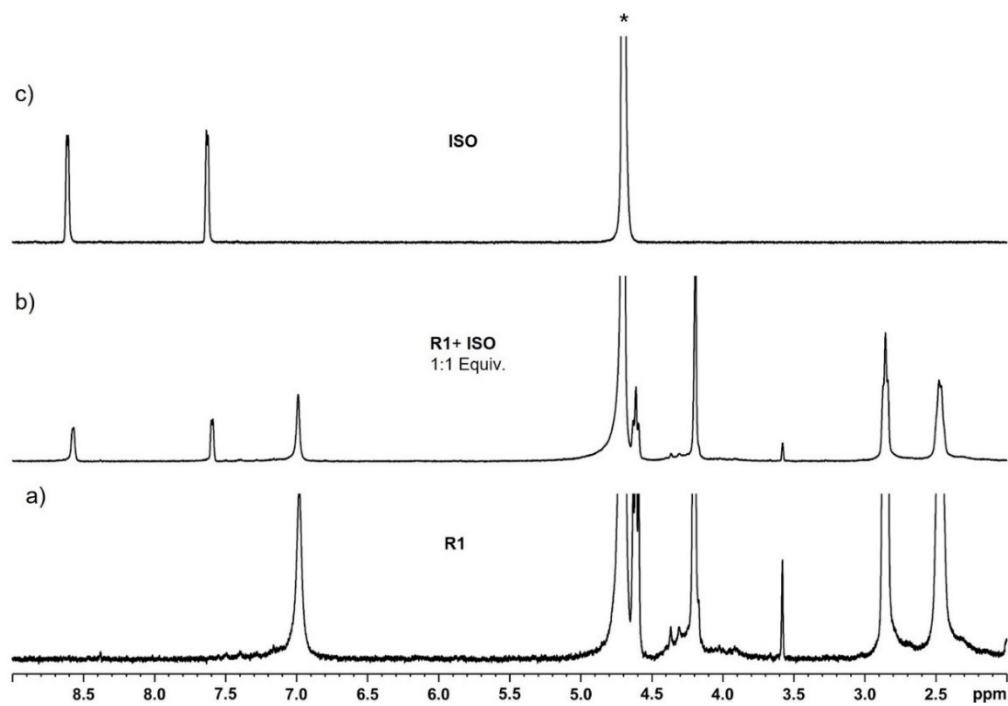

Figure S7: Sections of the  $^1\text{H}$  NMR spectra at 400 MHz in  $\text{D}_2\text{O}$  at 298 K of pure (a) receptor **R1** and (c) drug **ISO**, and (b) an equimolar mixture of **R1** and **ISO**. The star indicates the  $\text{D}_2\text{O}$  solvent peak.

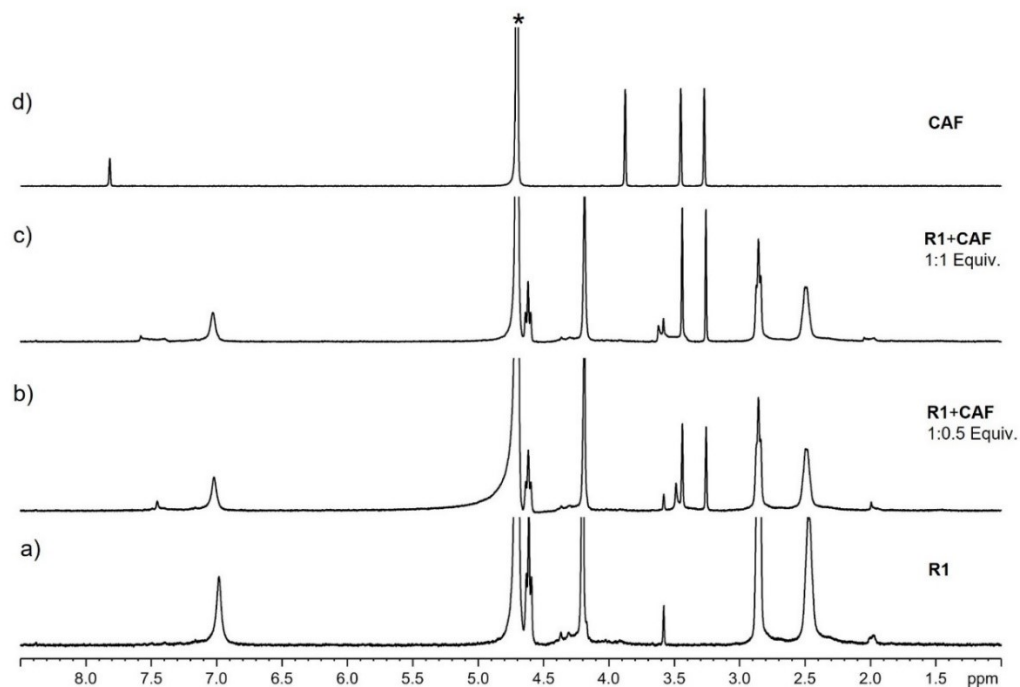

Figure S8: Sections of the <sup>1</sup>H NMR spectra at 400 MHz in D<sub>2</sub>O at 298 K of pure (a) receptor **R1** and (d) drug **CAF**, and an equimolar mixture of **R1** and **CAF** (b)1:0.5 equivalent and (c) 1:1 equivalent. The star indicates the D<sub>2</sub>O solvent peak.

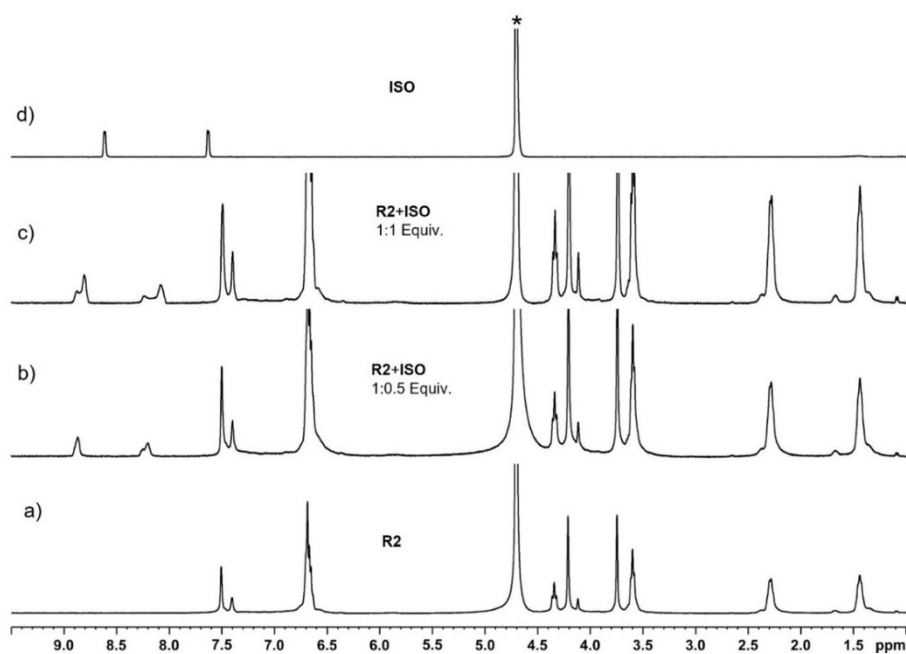

Figure S9: Sections of the <sup>1</sup>H NMR spectra at 400 MHz in D<sub>2</sub>O at 298 K of pure (a) receptor **R2** and (d) drug **ISO**, and mixtures of **R2** and **ISO** (b)1:0.5 equivalent and (c) 1:1 equivalent. The star indicates the D<sub>2</sub>O solvent peak.

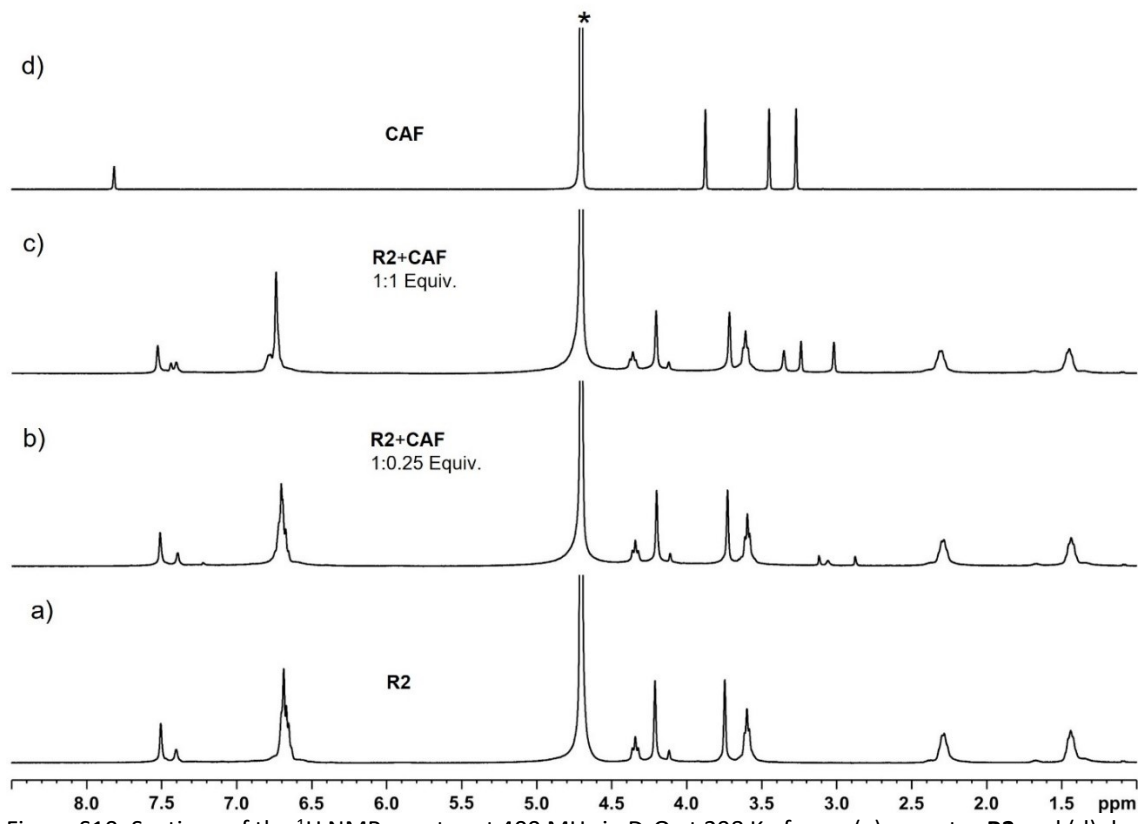

Figure S10: Sections of the  $^1\text{H}$  NMR spectra at 400 MHz in  $\text{D}_2\text{O}$  at 298 K of pure (a) receptor **R2** and (d) drug **CAF**, and mixtures of **R2** and **CAF** (b)1:0.25 equivalent and (c) 1:1 equivalent. The star indicates the  $\text{D}_2\text{O}$  solvent peak.

### ISOTHERMAL CALORIMETRIC TITRATIONS

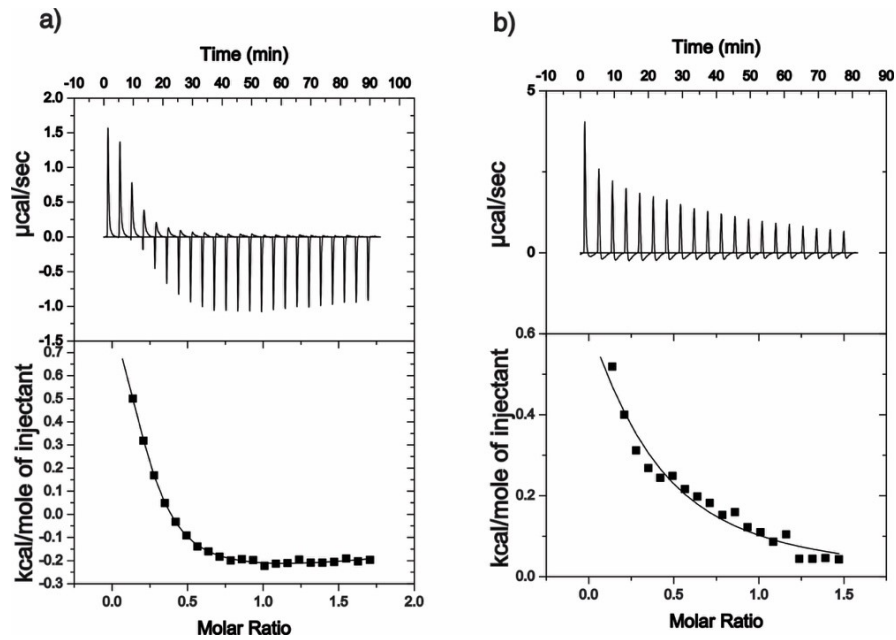

Figure S11: Isothermal calorimetric titration isotherms of **ISO** with: a) **R1** b) **R2** in deionized water at 298K

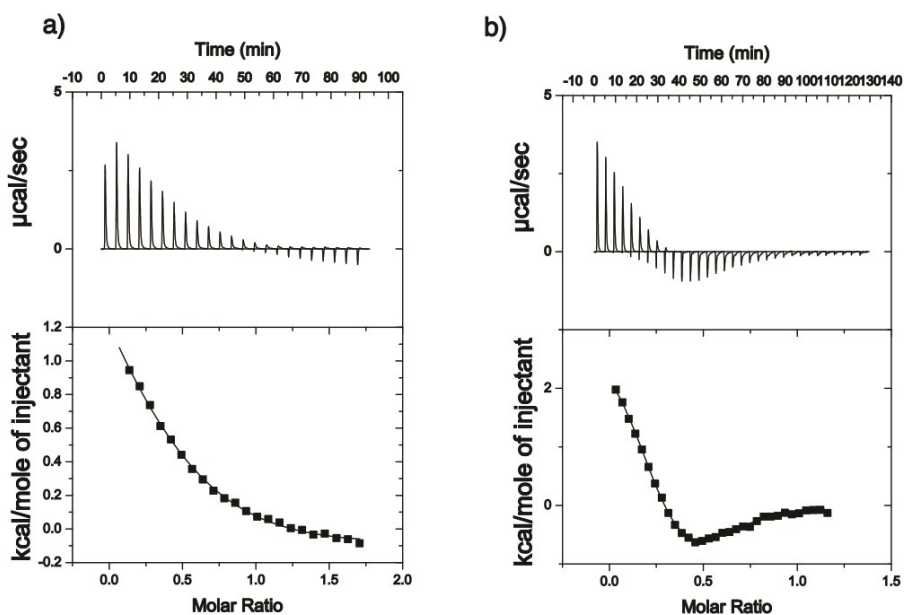

Figure S12: Isothermal calorimetric titration isotherms of **CAF** with: a) **R1** b) **R2** in deionized water at 298K

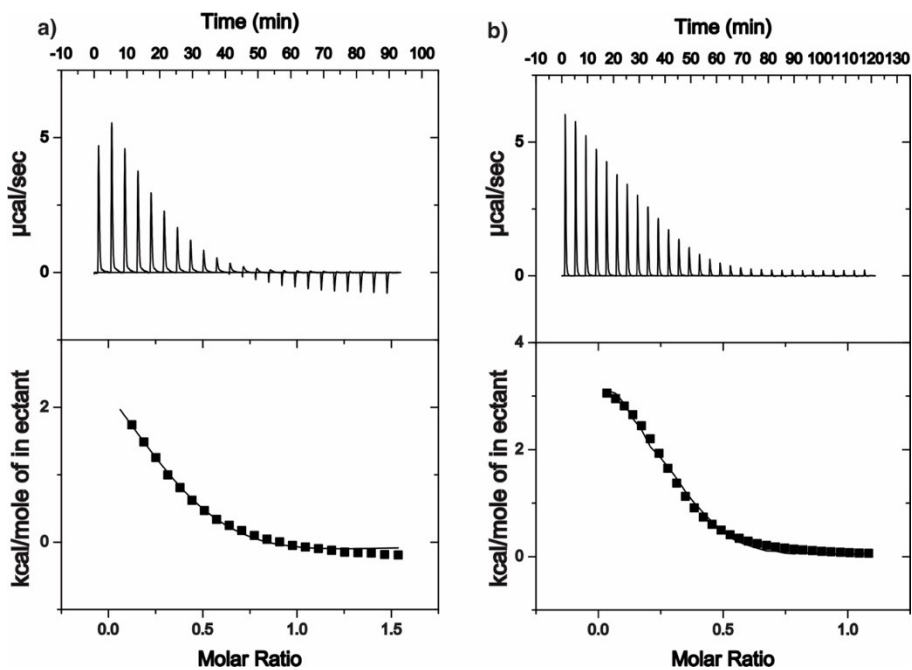

Figure S13: Isothermal calorimetric titration isotherms of **GRI** with: a) **R1** b) **R2** in deionized water at 298K



## DYNAMIC LIGHT SCATTERING

3ml of drug concentration was prepared by measuring enough of a drug material directly into the sample cuvette to create 500mM, 100mM and 50mM of **ISO**, **CAF** and **GRI** respectively (a). DLS measurements were collected in triplicates and averaged. 30mg of **R1** and **R2** was also added directly into the same cuvette to create a 10mg/ml solution (b). DLS measurements are again collected in triplicates and averaged.

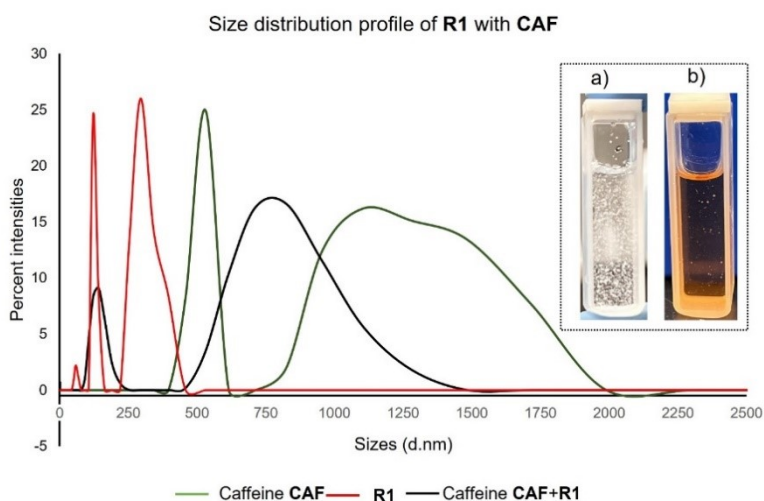

Figure S14: Illustration of the dynamic light scattering (DLS) experiment showing the size distribution profile of the pure drug **CAF**, pure receptor **R1**, and equimolar mixtures of the receptor and the drugs **CAF+R1**. Inset: Picture showing the pure drug (i) and the equimolar receptor-drug (ii) mixture, respectively.

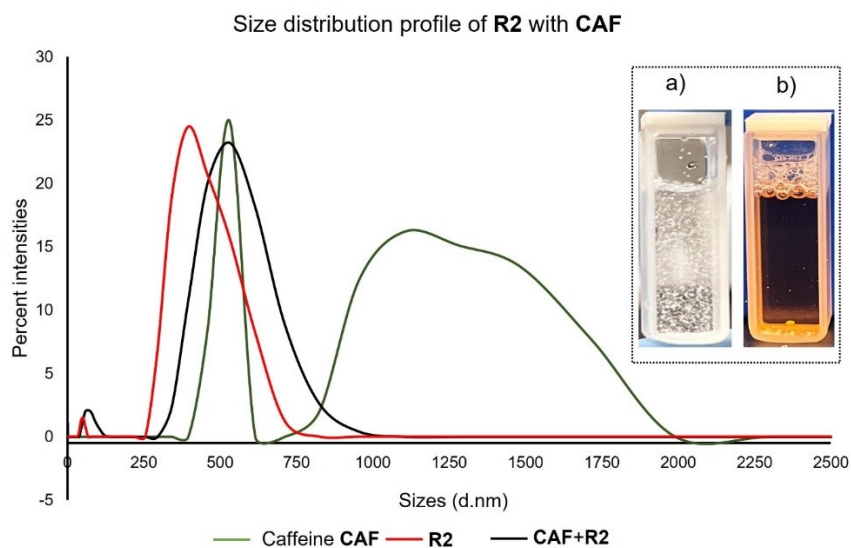

Figure S15: Illustration of the dynamic light scattering (DLS) experiment showing the size distribution profile of the pure drug **CAF**, pure receptor **R2**, and equimolar mixtures of the receptor and the drugs **CAF+R2**. Inset: Picture showing the pure drug (a) and the equimolar receptor-drug (b) mixture, respectively.

## CYTOTOXICITY ASSESSMENTS

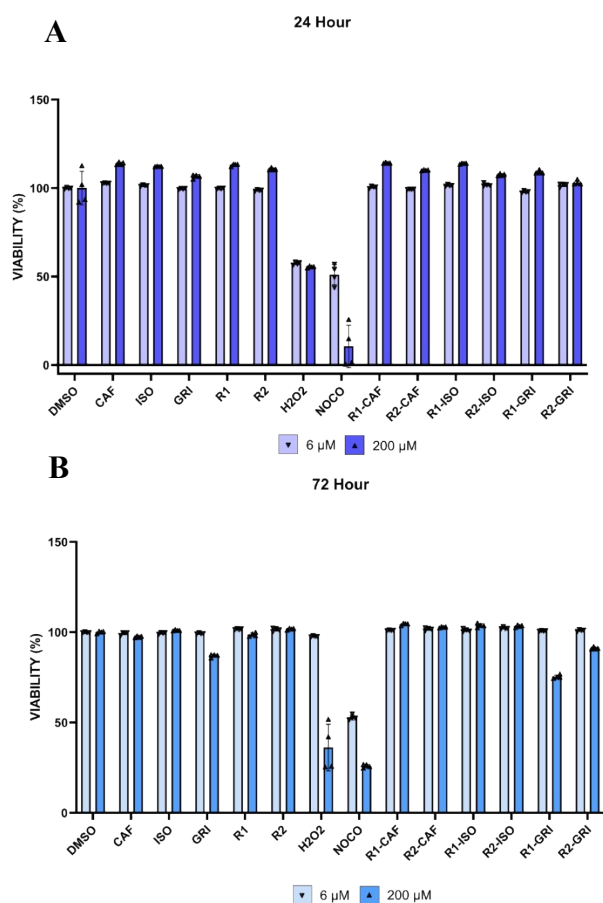

| Tukey's multiple comparisons test (24 h) | Summary | Adjusted P Value | Tukey's multiple comparisons test (24 h) | Summary | Adjusted P Value |
|------------------------------------------|---------|------------------|------------------------------------------|---------|------------------|
| DMSO 6 μM vs. CAF 6 μM                   | **      | 0.0023           | DMSO 200 μM vs. R2-GRI 200 μM            | ns      | >0.9999          |
| DMSO 6 μM vs. ISO 6 μM                   | ns      | 0.9899           | CAF 6 μM vs. R1-CAF 6 μM                 | ns      | 0.0714           |
| DMSO 6 μM vs. GRI 6 μM                   | ns      | 0.9893           | CAF 6 μM vs. R2-CAF 6 μM                 | **      | 0.0025           |
| DMSO 6 μM vs. R1 6 μM                    | ns      | 0.8567           | CAF 200 μM vs. R1-CAF 200 μM             | ns      | 0.995            |
| DMSO 6 μM vs. R2 6 μM                    | **      | 0.002            | CAF 200 μM vs. R2-CAF 200 μM             | *       | 0.0314           |
| DMSO 6 μM vs. H2O2 6 μM                  | ****    | <0.0001          | ISO 6 μM vs. R1-ISO 6 μM                 | ns      | >0.9999          |
| DMSO 6 μM vs. NOCO 6 μM                  | **      | 0.0062           | ISO 6 μM vs. R2-ISO 6 μM                 | ns      | 0.9992           |
| DMSO 6 μM vs. R1-CAF 6 μM                | ns      | 0.9205           | ISO 200 μM vs. R1-ISO 200 μM             | **      | 0.0112           |
| DMSO 6 μM vs. R2-CAF 6 μM                | ns      | 0.8179           | ISO 200 μM vs. R2-ISO 200 μM             | *       | 0.0069           |
| DMSO 6 μM vs. R1-ISO 6 μM                | ***     | 0.0003           | GRI 6 μM vs. R1-GRI 6 μM                 | ns      | 0.3071           |
| DMSO 6 μM vs. R2-ISO 6 μM                | ns      | 0.4364           | GRI 6 μM vs. R2-GRI 6 μM                 | ns      | 0.3855           |
| DMSO 6 μM vs. R1-GRI 6 μM                | ns      | 0.0869           | GRI 200 μM vs. R1-GRI 200 μM             | ns      | 0.7305           |
| DMSO 6 μM vs. R2-GRI 6 μM                | ns      | 0.4675           | GRI 200 μM vs. R2-GRI 200 μM             | ns      | 0.1514           |
| DMSO 200 μM vs. CAF 200 μM               | ns      | 0.5665           | R1 6 μM vs. R1-CAF 6 μM                  | ns      | 0.8262           |
| DMSO 200 μM vs. ISO 200 μM               | ns      | 0.6911           | R1 6 μM vs. R1-ISO 6 μM                  | *       | 0.0111           |
| DMSO 200 μM vs. GRI 200 μM               | ns      | 0.9926           | R1 6 μM vs. R1-GRI 6 μM                  | ns      | 0.148            |
| DMSO 200 μM vs. R1 200 μM                | ns      | 0.5888           | R1 200 μM vs. R1-CAF 200 μM              | ns      | 0.4222           |
| DMSO 200 μM vs. R2 200 μM                | ns      | 0.7892           | R1 200 μM vs. R1-ISO 200 μM              | ns      | 0.9156           |
| DMSO 200 μM vs. H2O2 200 μM              | *       | 0.0425           | R1 200 μM vs. R1-GRI 200 μM              | ns      | 0.0524           |
| DMSO 200 μM vs. NOCO 200 μM              | *       | 0.0267           | R2 6 μM vs. R2-CAF 6 μM                  | ns      | 0.7016           |
| DMSO 200 μM vs. R1-CAF 200 μM            | ns      | 0.5636           | R2 6 μM vs. R2-ISO 6 μM                  | ns      | 0.1296           |
| DMSO 200 μM vs. R2-CAF 200 μM            | ns      | 0.8428           | R2 6 μM vs. R2-GRI 6 μM                  | ns      | 0.1345           |
| DMSO 200 μM vs. R1-ISO 200 μM            | ns      | 0.5792           | R2 200 μM vs. R2-CAF 200 μM              | ns      | 0.9412           |
| DMSO 200 μM vs. R2-ISO 200 μM            | ns      | 0.9594           | R2 200 μM vs. R2-ISO 200 μM              | ns      | 0.1392           |
| DMSO 200 μM vs. R1-GRI 200 μM            | ns      | 0.8397           | R2 200 μM vs. R2-GRI 200 μM              | *       | 0.0228           |

| Tukey's multiple comparisons test (72 h) | Summary | Adjusted P Value | Tukey's multiple comparisons test (72 h) | Summary | Adjusted P Value |
|------------------------------------------|---------|------------------|------------------------------------------|---------|------------------|
| DMSO 6 vs. CAF:6                         | ns      | 0.9633           | DMSO:200 vs. R2-GRI:200                  | **      | 0.0022           |
| DMSO 6 vs. ISO:6                         | ns      | 0.9132           | CAF:6 vs. R1-CAF:6                       | ns      | 0.2986           |
| DMSO 6 vs. GRI:6                         | ns      | 0.7413           | CAF:6 vs. R2-CAF:6                       | *       | 0.0129           |
| DMSO 6 vs. R1:6                          | ns      | 0.0715           | CAF:200 vs. R1-CAF:200                   | **      | 0.0019           |
| DMSO 6 vs. R2:6                          | ns      | 0.4728           | CAF:200 vs. R2-CAF:200                   | *       | 0.0114           |
| DMSO 6 vs. H2O2:6                        | **      | 0.0015           | ISO:6 vs. R1-ISO:6                       | ns      | 0.2135           |
| DMSO 6 vs. NOCO:6                        | ****    | <0.0001          | ISO:6 vs. R2-ISO:6                       | ns      | 0.1838           |
| DMSO 6 vs. R1-CAF:6                      | **      | 0.0097           | ISO:200 vs. R1-ISO:200                   | ns      | 0.083            |
| DMSO 6 vs. R2-CAF:6                      | ns      | 0.2528           | ISO:200 vs. R2-ISO:200                   | ns      | 0.1297           |
| DMSO 6 vs. R1-ISO:6                      | ns      | 0.6295           | GRI:6 vs. R1-GRI:6                       | *       | 0.0156           |
| DMSO 6 vs. R2-ISO:6                      | ns      | 0.0898           | GRI:6 vs. R2-GRI:6                       | ns      | 0.1519           |
| DMSO 6 vs. R1-GRI:6                      | ns      | 0.2355           | GRI:200 vs. R1-GRI:200                   | *       | 0.0163           |
| DMSO 6 vs. R2-GRI:6                      | ns      | 0.1383           | GRI:200 vs. R2-GRI:200                   | *       | 0.0199           |
| DMSO:200 vs. CAF:200                     | ns      | 0.159            | R1:6 vs. R1-CAF:6                        | ns      | 0.5613           |
| DMSO:200 vs. ISO:200                     | ns      | 0.6043           | R1:6 vs. R1-ISO:6                        | ns      | 0.997            |
| DMSO:200 vs. GRI:200                     | **      | 0.0021           | R1:6 vs. R1-GRI:6                        | ns      | 0.2268           |
| DMSO:200 vs. R1:200                      | ns      | 0.9177           | R1:200 vs. R1-CAF:200                    | *       | 0.0146           |
| DMSO:200 vs. R2:200                      | ns      | 0.3686           | R1:200 vs. R1-ISO:200                    | ns      | 0.1492           |
| DMSO:200 vs. H2O2:200                    | *       | 0.0311           | R1:200 vs. R1-GRI:200                    | **      | 0.002            |
| DMSO:200 vs. NOCO:200                    | ****    | <0.0001          | R2:6 vs. R2-CAF:6                        | ns      | >0.9999          |
| DMSO:200 vs. R1-CAF:200                  | *       | 0.0427           | R2:6 vs. R2-ISO:6                        | ns      | 0.6231           |
| DMSO:200 vs. R2-CAF:200                  | ns      | 0.0593           | R2:6 vs. R2-GRI:6                        | ns      | 0.9998           |
| DMSO:200 vs. R1-ISO:200                  | ns      | 0.1377           | R2:200 vs. R2-CAF:200                    | ns      | 0.6374           |
| DMSO:200 vs. R2-ISO:200                  | ns      | 0.1336           | R2:200 vs. R2-ISO:200                    | ns      | 0.376            |
| DMSO:200 vs. R1-GRI:200                  | ****    | <0.0001          | R2:200 vs. R2-GRI:200                    | **      | 0.0019           |

Figure S16: Compounds assayed for cytotoxicity (quantitative crystal violet assay). HEK-293 cells were incubated with a combination of carriers R1 or R2 and caffeine (CAF) or griseofulvin (GRIS) or isoniazid (ISO) to infer cytotoxicity via crystal violet assay. Cells are assayed at concentrations 6 or 200 μM for 24 (A) or 72 (B) hours. OD data are shown as viability percentages. Vehicle DMSO serves as negative control. Nocodazole or H2O2 serve as positive control. Data are representative of at least three biological replicates (mean ± SD), in technical triplicates. Two-way ANOVA Tukey's multiple comparison test results are shown in the summary tables.

## REFERENCES

- 1 P. Timmerman, W. Verboom and D. N. Reinhoudt, *Tetrahedron*, 1996, **52**, 2663–2704.
- 2 A. Karle, K. Twum, N. Sabbagh, A. Haddad, S. M. Taimoory, M. M. Szczyński, E. Trivedi, J. F. Trant and N. K. Beyeh, *Analyst*, 2022, **147**, 2264–2271.
- 3 K. Twum, A. Bhattacharjee, E. T. Laryea, J. Esposto, G. Omolloh, S. Mortensen, M. Jaradi, N. L. Stock, N. Schileru, B. Elias, E. Pszenica, T. M. McCormick, S. Martic and N. K. Beyeh, *RSC Med Chem*, 2021, **12**, 2022–2030.
- 4 K. Twum, S. I. Sadraei, J. Feder, S. M. Taimoory, K. Rissanen, J. F. Trant and N. K. Beyeh, *Org Chem Front*, 2022, **9**, 1267–1275.
